# Supplementary material for: Highly modular hepatitis B virus-like nanocarriers for therapeutic protein encapsulation and targeted delivery to triple negative breast cancer cells
Source: Royal Society of Chemistry journal article supplement (doi:10.1039/d3tb00445g), 2023-01-01
Supplement: d3tb00445g1.pdf [file d3tb00445g1.pdf]

**Supporting Information (SI) for:**

**Highly modular hepatitis B virus-like nanocarriers for  
therapeutic protein encapsulation and targeted delivery to  
triple negative breast cancer cells**

*Daniel Yur, Millicent O. Sullivan\*, and Wilfred Chen\**

Department of Chemical and Biomolecular Engineering, University of Delaware, 150 Academy Street, Newark, DE 19716 United States of America

Corresponding authors: Millicent O. Sullivan email: [msullivan@udel.edu](mailto:msullivan@udel.edu) and Wilfred Chen email: [wilfred@udel.edu](mailto:wilfred@udel.edu)

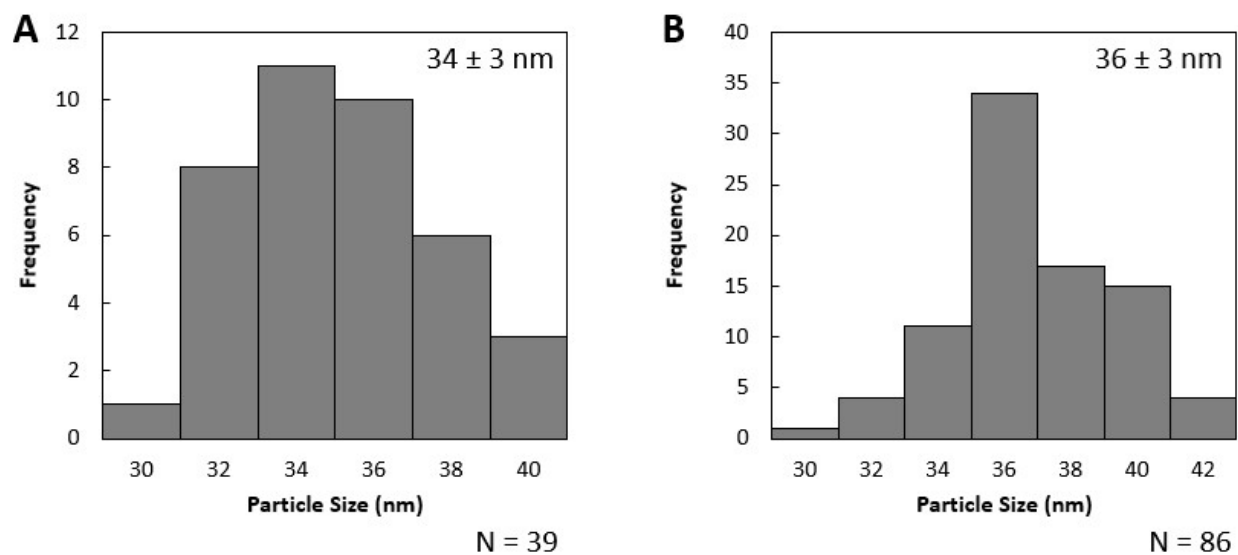

**Figure S1:** Histogram of HBV<sub>SpyTag</sub> particle sizes. Measurements of particle sizes from TEM images via Image J were taken of HBV<sub>SpyTag</sub> from (A) pooled sucrose gradient ultracentrifugation fractions 7-10 and (B) ELP[KV8F-40]-SpyCatcher (ELP<sub>40</sub>-SpyCatcher) purification samples. Error in average particle diameter is the standard deviation of the respective measured diameters.

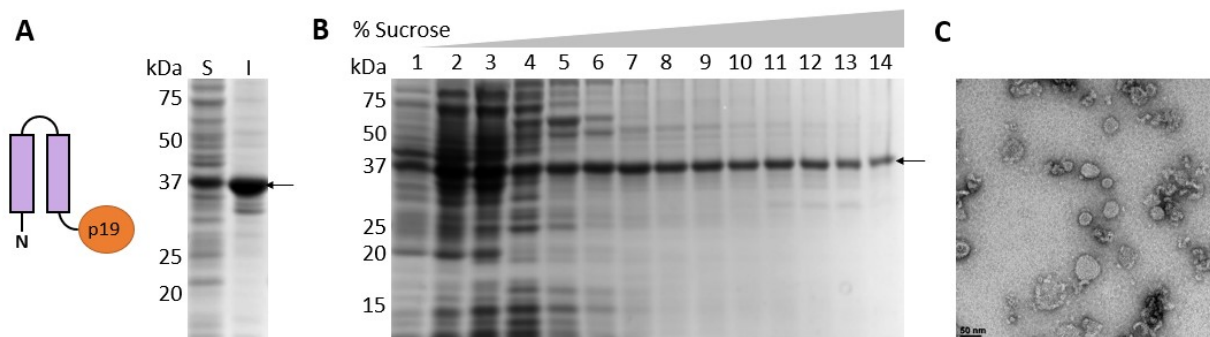

**Figure S2:** Analysis of HBV-p19 protein self-assembly. **(A)** HBV-p19 was expressed in BL21 and the soluble and insoluble lysates were assessed with SDS-PAGE. Arrow shows the location of the HBV-p19. **(B)** Sucrose gradient ultracentrifugation separated HBV-p19 proteins that formed capsid-sized nanostructures (fractions 7-10) from proteins that were not assembled (fractions 1-6) and proteins that formed larger aggregates (fractions 11-14). Arrow shows the HBV-p19 protein across the different fractions. **(C)** TEM demonstrated the protein structures that were formed with pooled fractions (8 and 9) from the sucrose gradient analysis.

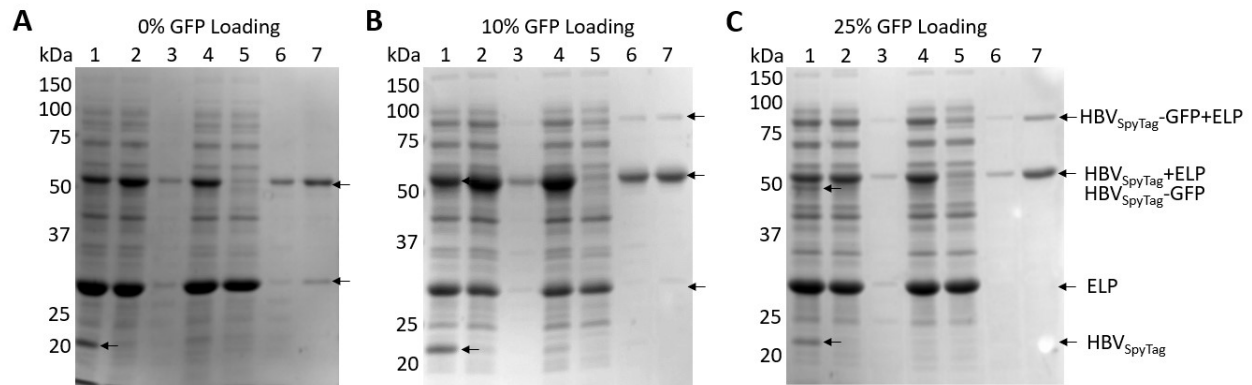

**Figure S3:** ELP<sub>40</sub>-SpyCatcher reaction with HBV<sub>SpyTag</sub>(GFP) lysates and subsequent inverse transition cycling. SDS-PAGE analysis was performed to assess the ligation of ELP<sub>40</sub> purification tags to HBV<sub>SpyTag</sub> VLPs with 0% (A), 10% (B), or 25% (C) GFP loading and their subsequent purification through ITC: (1) ELP-SpyCatcher mixed with HBV<sub>SpyTag</sub>(GFP) lysate at a 2:1 molar ratio, (2) Protein sample after overnight reaction, (3) Insoluble proteins post-reaction, (4) Soluble proteins post-reaction, (5) ITC: soluble contaminants, (6) ITC: Insoluble contaminants, (7) ITC: purified VLPs. The percentages are the average per VLP.

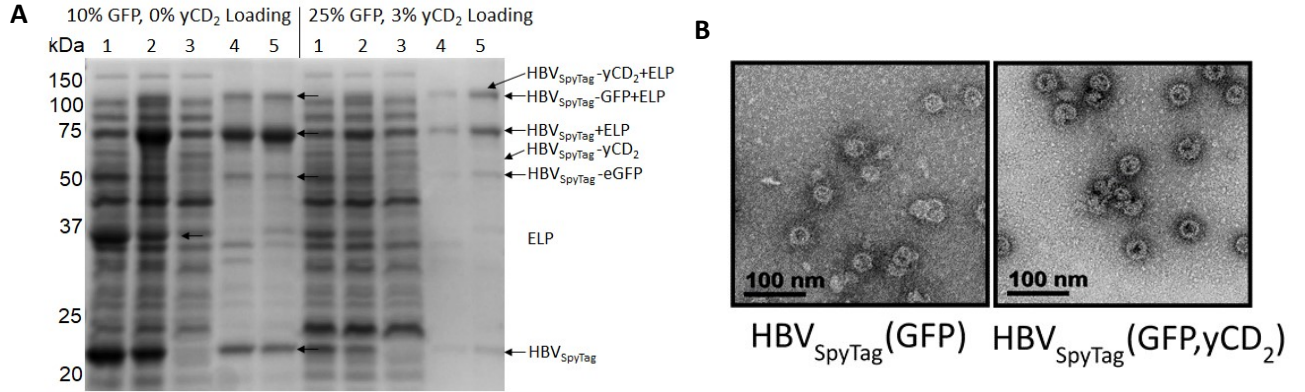

**Figure S4:** Purification of tri-expressed VLPs: HBV<sub>SpyTag</sub>(GFP,yCD<sub>2</sub>) (A) ELP<sub>40</sub>-SpyCatcher reaction with tri-expressed HBV<sub>SpyTag</sub>(GFP,yCD<sub>2</sub>) VLPs and subsequent cycle of ITC: (1) ELP-SpyCatcher mixed with HBV<sub>SpyTag</sub>(GFP,yCD<sub>2</sub>) respective sample at a 2:1 molar ratio, (2) Post-reaction protein sample, (3) ITC: soluble contaminants, (4) ITC: Insoluble contaminants, (5) ITC: purified VLPs. Arrows point to labeled corresponding protein species. The percentages are the average per VLP. (B) Purified HBV<sub>SpyTag</sub>(GFP,yCD<sub>2</sub>) remained intact as confirmed by TEM.

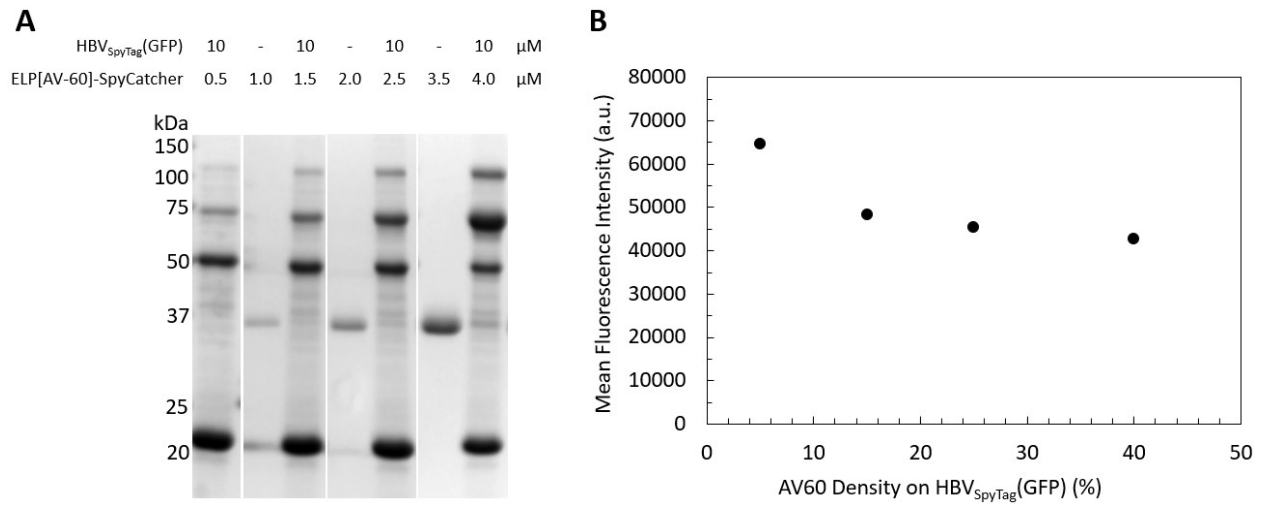

**Figure S5:** Assessing how ligation density of ELPs on exterior of HBV<sub>SpyTag</sub>(GFP) VLPs affect non-specific uptake in SUM149 cells. **(A)** SDS-PAGE demonstrated modification of HBV<sub>SpyTag</sub>(GFP) the exterior of the VLP with a 15%, 25% or 40% ligation density of ELP[AV-60]-SpyCatcher (ELP<sub>60</sub>-SpyCatcher). **(B)** Mean fluorescence intensity of HBV<sub>SpyTag</sub>(GFP) modified with 5-40% ELP<sub>60</sub>-SpyCatcher was delivered to SUM149 cells and assessed by flow cytometry. The percentages are the average per VLP.

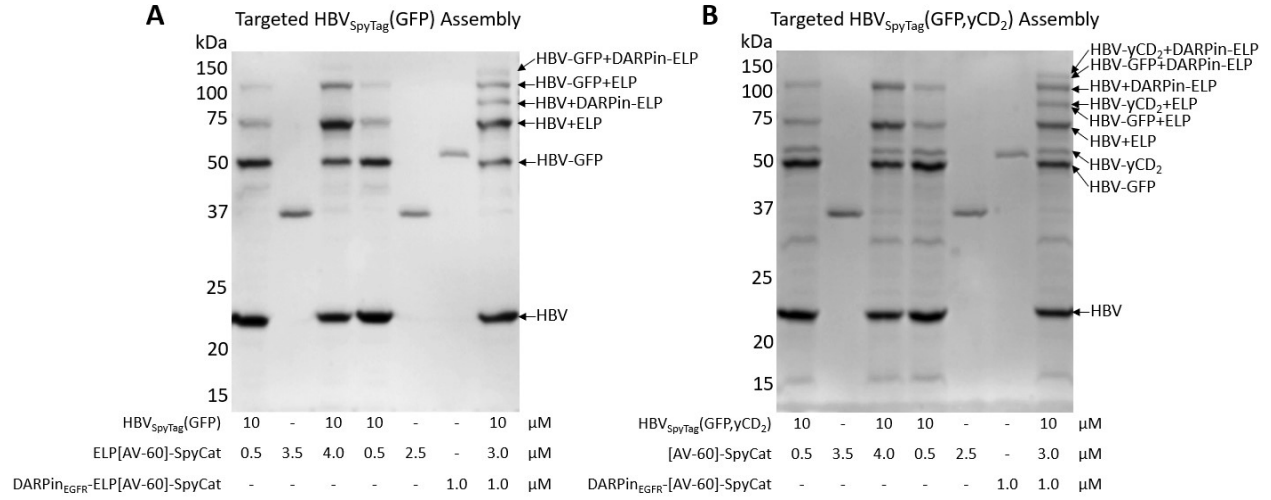

**Figure S6:** Assembly of targeted HBV<sub>SpyTag</sub>(GFP) and HBV<sub>SpyTag</sub>(GFP,yCD<sub>2</sub>) for cell-specific delivery. SDS-PAGE demonstrated modification of dual-expressed HBV<sub>SpyTag</sub>(GFP) (**A**) and tri-expressed HBV<sub>SpyTag</sub>(GFP,yCD<sub>2</sub>) VLPs (**B**) with a total 40% ligation density of ELP<sub>60</sub>-SpyCatcher, with targeted VLPs having a 10% density of DARPin<sub>EGFR</sub> added at the N-terminus of 25% of the ligated ELP<sub>60</sub>-SpyCatcher proteins. The percentages are the average per VLP.

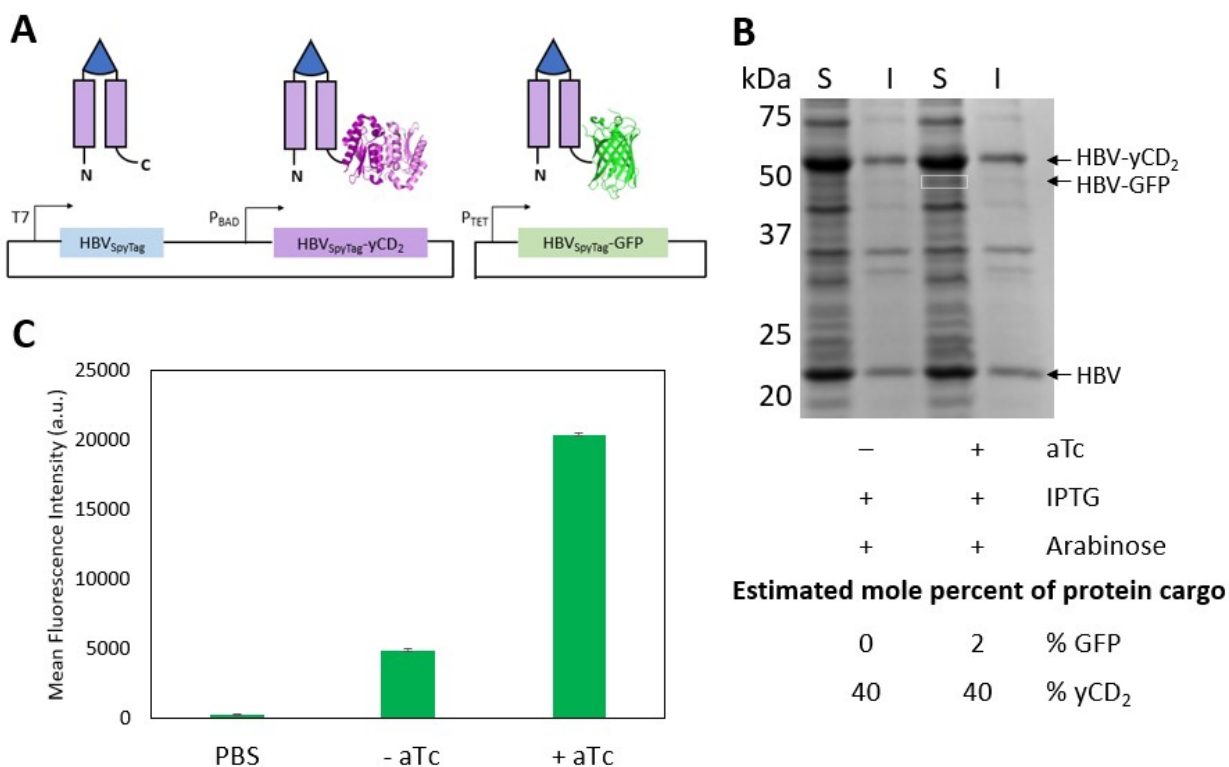

**Figure S7:** Alternative tri-expression system for high yCD<sub>2</sub> loading in VLP. **(A)** The original tri-expression system was altered by switching the *E. coli* promoter controlling the HBV<sub>SpyTag</sub>-yCD<sub>2</sub> and HBV<sub>SpyTag</sub>-GFP genes. **(B)** SDS-PAGE analysis of soluble and insoluble lysates resulting from inducing expression with IPTG and arabinose or aTc, IPTG, and arabinose using the modified tri-expression system. Estimated mole percent of protein cargoes was assessed by using densitometry. Boxed protein band on SDS-PAGE corresponds to HBV-GFP protein. The percentages are the average per VLP. **(C)** Fluorescence of the soluble lysate samples with or without aTc was measured to confirm GFP production (Ex: 470 nm, Em: 520 nm). Error bars are standard deviation from technical replicates (N = 3).

Section 2: Supplementary Information

**Tables S1:** DNA primers used in restriction enzyme cloning

| <b>Name:</b>                                                      | <b>Sequence:</b>                                                                        |
|-------------------------------------------------------------------|-----------------------------------------------------------------------------------------|
| KpNI-GGGSGGG-SpyTag-GG-BamHI(+)                                   | CGGAGGGGGAAGCGGTGGAGGTGCACAC<br>ATAGTAATGGTAGACGCCTACAAGCCGAC<br>GAAGGGTGGAG            |
| KpNI-GGGSGGG-SpyTag-GG-BamHI(-)                                   | GATCCTCCACCCTTCGTCGGCTTGTAGGCG<br>TCTACCATTACTATGTGTGCACCTCCACCG<br>CTTCCCCCTCCGGTAC    |
| NcoI-DARPin_EGFR_Fw                                               | GATGATCCATGGATCTGGGCAAAAATTG<br>TTAGAAG                                                 |
| NdeI-S-(G <sub>4</sub> S) <sub>2</sub> -GGSA-DARPin_EGFR_Rev      | GATGATCATATGGCTTCCACCACCTCCTG<br>AGCCGCCACCACCAGAGCCGCCGCTAGC<br>ATTCAGTTTCTGCAGAATTTCG |
| SacI-HBV <sub>SpyTag</sub> _Fw                                    | GATGATGAGCTCGATCCGGCTGCTAAC                                                             |
| XhoI-HBV <sub>SpyTag</sub> _Rev                                   | GATGATCTCGAGCCAACAACAGTAGTCTC<br>CGGAAGTGTTG                                            |
| XhoI-A-(G <sub>3</sub> S) <sub>3</sub> -G <sub>4</sub> T-AgeI (+) | TCGAGTGCAGGTGGCGGTAGTGGTGGCGG<br>GTCTGGAGGTGGCTCAGGCGGTGGAGGGA<br>CTA                   |
| XhoI-A-(G <sub>3</sub> S) <sub>3</sub> -G <sub>4</sub> T-AgeI (-) | CCGGTAGTCCCTCCACCGCCTGAGCCACC<br>TCCAGACCCGCCACCACTACCGCCACCTG<br>CAC                   |
| XhoI-GFP_Fw                                                       | GATGATACCGGTATGGTGAGCAAGGGCG                                                            |
| SacI-His6-GFP_Rev                                                 | GATGATGAGCTCTTAGTGATGGTGATGGT<br>GATGCTTGACAGCTCGTCCATG                                 |
| AgeI-yCD_Fw                                                       | GATGATACCGGTGTGACCGGCGGAATG                                                             |
| BamHI-G <sub>3</sub> -yCD_Rev                                     | GATGATGGATCCACCGCCACCTTCTCCAA<br>TATCCTCAAACCAGTC                                       |
| BamHI-G <sub>4</sub> S-yCD_Fw                                     | GATGATGGATCCGGTGGCGGGGGTTCGGT<br>GACCGGCGGAATG                                          |

|                                         |                                                               |
|-----------------------------------------|---------------------------------------------------------------|
| AvrII-His6-yCD_Rev                      | GATGATCCTAGGTTAGTGATGGTGATGGT<br>GATGTTCTCCAATATCCTCAAACCAGTC |
| SphI-HBV <sub>SpyTag</sub> -GFP-h6 Fw   | GATGATGCATGCATGGACATCGACCCTTA<br>TAAAG                        |
| HBV <sub>SpyTag</sub> -GFP-h6-AvrII Rev | GATGATCCTAGGTCATTAATGGTGATGGT<br>GGTGATGCTTGTACAGCTC          |

**Tables S2:** DNA primers used in Gibson assembly cloning

| Name:                                   | Sequence:                                                  |
|-----------------------------------------|------------------------------------------------------------|
| pET24a-HBV <sub>SpyTag</sub> vector_Fw  | GGGTCCTCAACGACAGGAG                                        |
| pET24a-HBV <sub>SpyTag</sub> vector_Rev | CTGGTTAGCAGAATGAATCACCGATAC                                |
| araC-pBad promoter_Fw                   | ATCGGTGATTTCATTCTGCTAACCAGTAA<br>GGCAGTTATTGGTGCCC         |
| araC-pBad promoter_Rev                  | CAAATTCTTTATAAGGGTCGATGTCCAT<br>GACTAGTCTCCTTCTTAAAGTTAAAC |
| HBV <sub>SpyTag</sub> -GFP_Fw           | GACATCGACCCTTATAAAGAATTTGGAG                               |
| HBV <sub>SpyTag</sub> -GFP_Rev          | AACAGATCTGATATCGGCGCTGGCGCCT<br>AGGGCTTTGTTAGCAGCCGGATC    |
| rrn1-rrn2 term_Fw                       | CGCCAGCGCCGATATC                                           |
| rrn1-rrn2 term_Rev                      | ATCGTGCTCCTGTCGTTGAGGACCCAAG<br>CTTAAGCTTGCGTTCTTCG        |
